# Supplementary material for: 2D coordination polymer-derived CoSe2–NiSe2/CN nanosheets: the dual-phase synergistic effect and ultrathin structure to enhance the hydrogen evolution reaction
Source: Royal Society of Chemistry journal article supplement (doi:10.1039/d1dt01487k), 2021-01-01
Supplement: d1dt01487k1.pdf [file d1dt01487k1.pdf]

Electronic Supplementary Information

## 2D MOF-derived ultra-thin CoSe<sub>2</sub>-NiSe<sub>2</sub>/CN: Dual-phase synergistic effect and abundant defects to enhance the hydrogen evolution reaction

Weifeng Jiang<sup>a, ‡</sup>, Jianpeng Sun<sup>b, ‡</sup>, Zhaodi Huang<sup>b</sup>, Chuanhai Jiang<sup>a</sup>, Huakai Xv<sup>a</sup>,  
Kebin Lu<sup>b</sup>, Ning Cao<sup>a,\*</sup> and Fangna Dai<sup>a,\*</sup>.

<sup>a</sup> School of Materials Science and Engineering, China University of Petroleum (East  
China), Qingdao, Shandong, 266580, PR China.

<sup>b</sup> College of Science, China University of Petroleum (East China), Qingdao, Shandong,  
266580, PR China.

\*Corresponding Author: [fndai@upc.edu.cn](mailto:fndai@upc.edu.cn); [caoning@upc.edu.cn](mailto:caoning@upc.edu.cn).

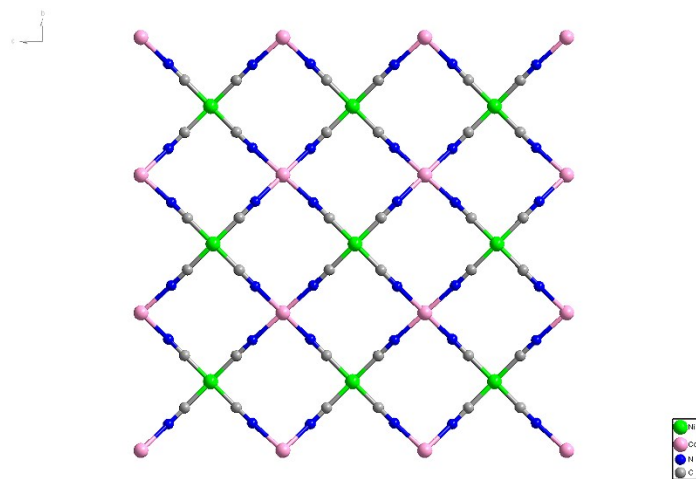

**Figure S1** The framework structure of 2D CP ( $\text{Co}[\text{Ni}(\text{CN})_4]$ ).

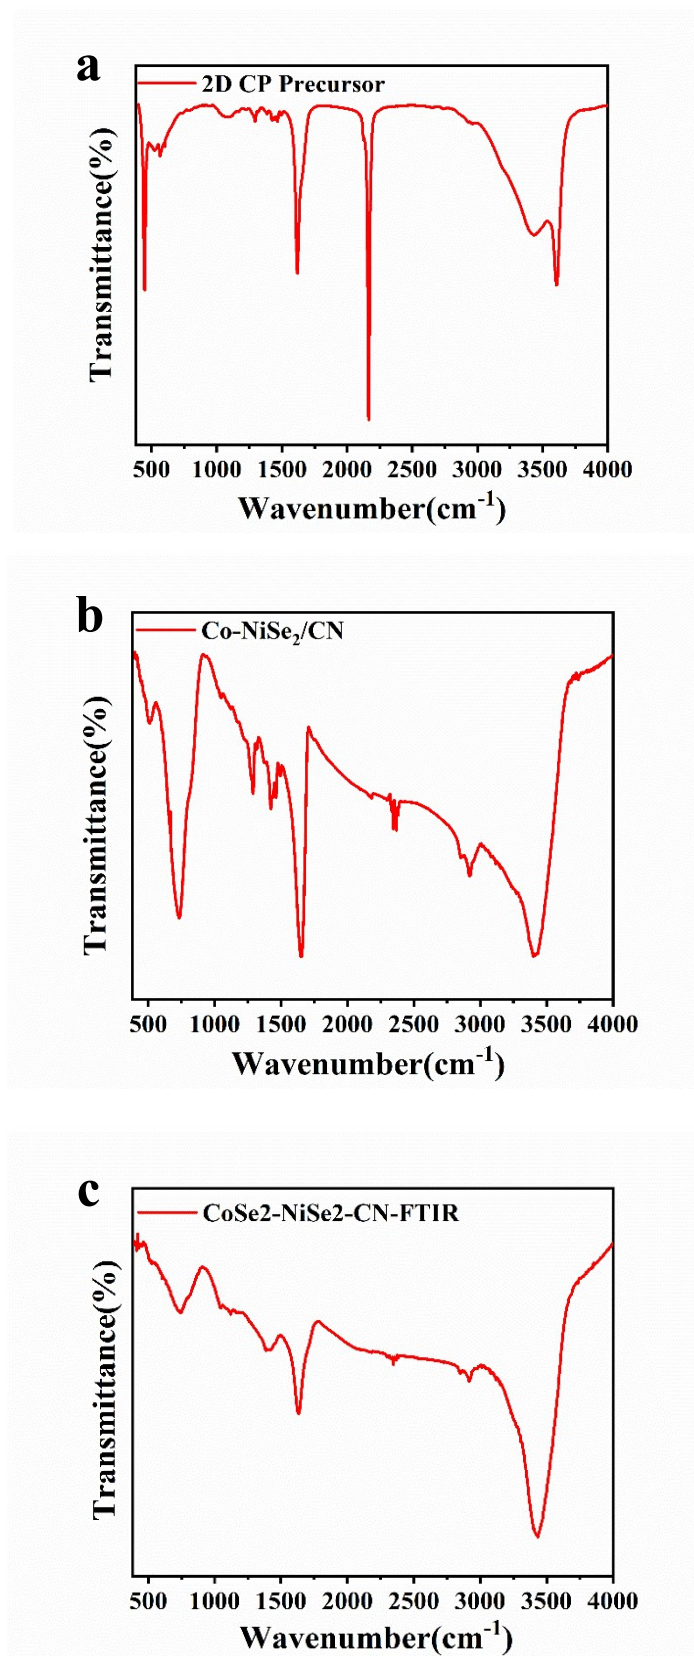

**Figure S2** FT-IR spectra of (a) 2D CP Precursor, (b) Co-NiSe<sub>2</sub>/CN and (c)CoSe<sub>2</sub>-

NiSe<sub>2</sub>/CN.

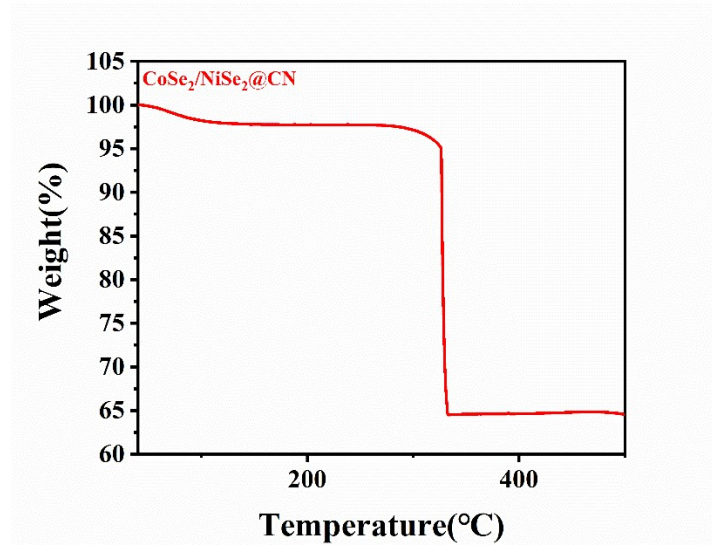

**Figure S3** (a) Thermogravimetric analysis (TGA) curves of CoSe<sub>2</sub>-NiSe<sub>2</sub>/CN measured under an O<sub>2</sub> atmosphere.

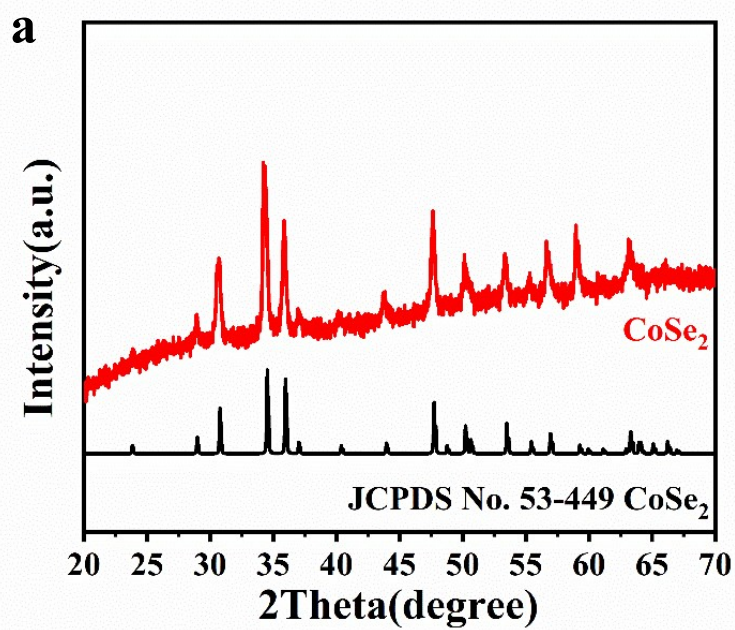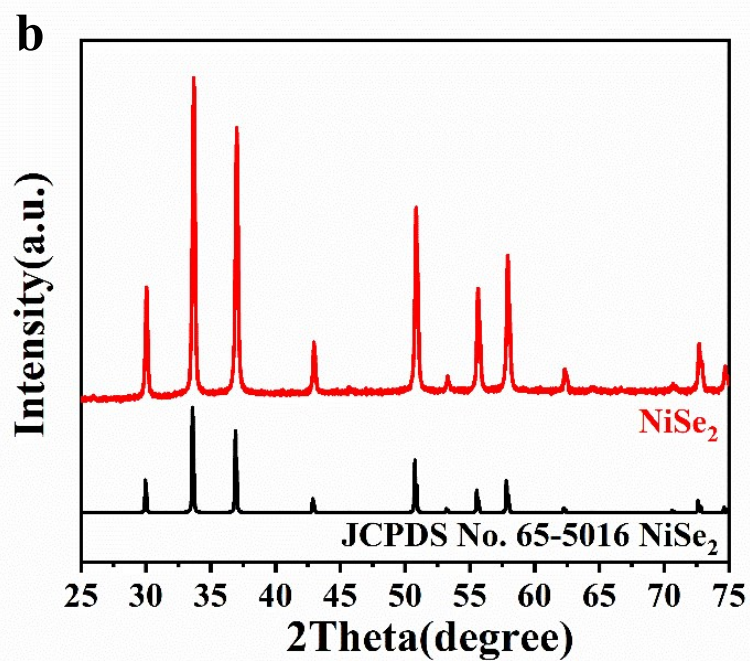

Figure S4 XRD pattern of (a) CoSe<sub>2</sub> and (b) NiSe<sub>2</sub>.

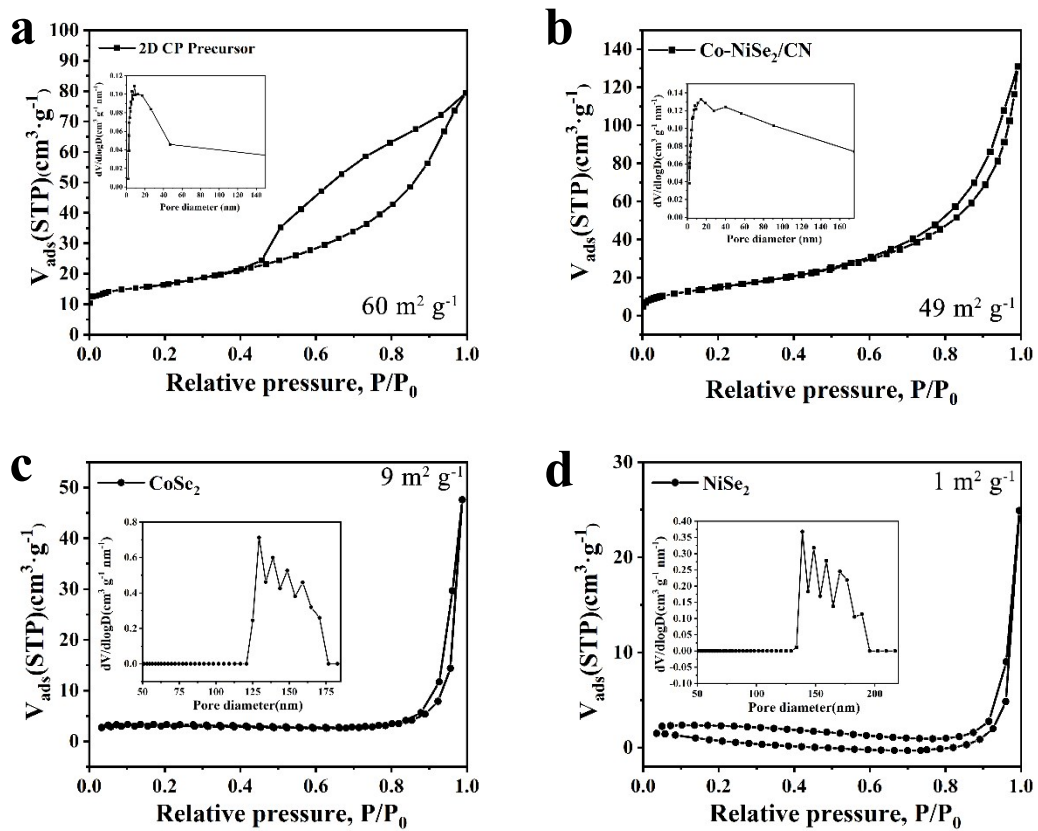

**Figure S5**  $N_2$  adsorption-desorption isotherms of (a) 2D CP Precursor, (b) Co-NiSe<sub>2</sub>/CN, (c) CoSe<sub>2</sub> and (d) NiSe<sub>2</sub>.

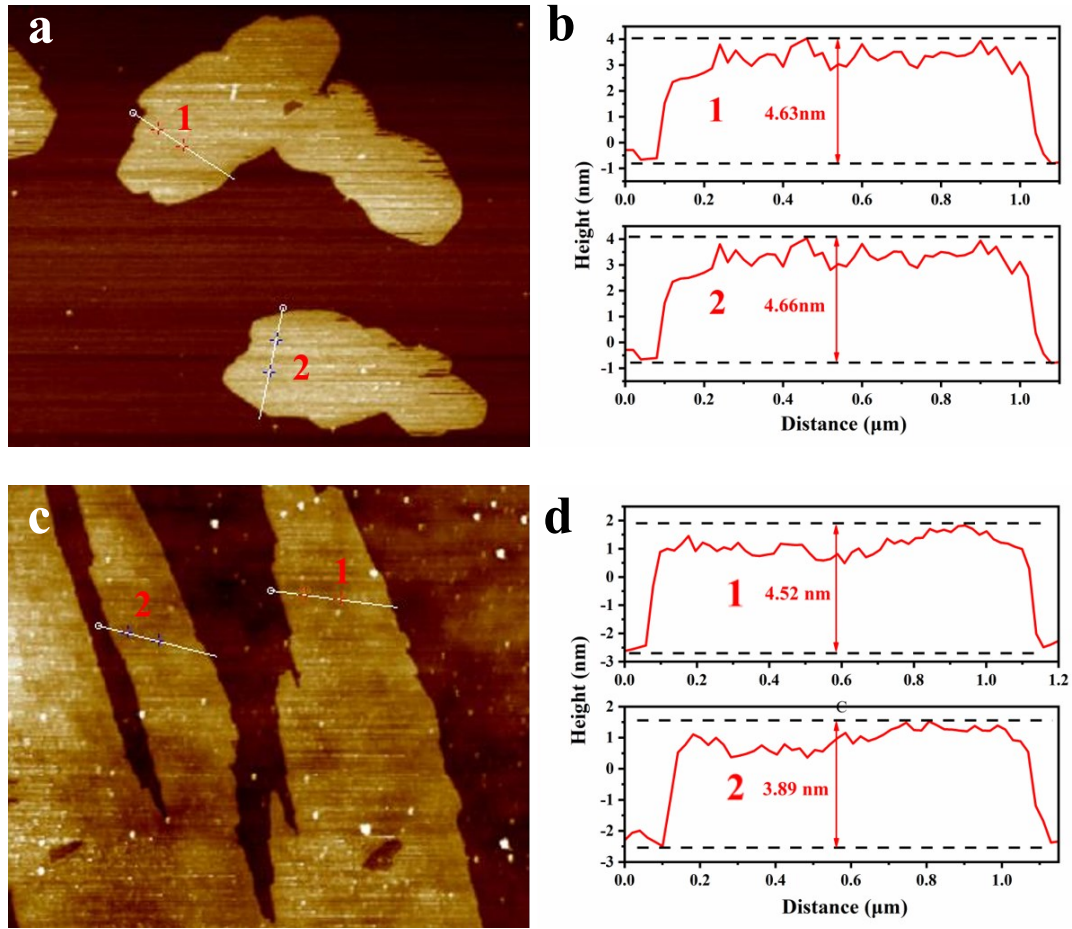

**Figure S6** AFM image and the corresponding height profiles of 2D CP Precursor (a)

and Co-NiSe<sub>2</sub>/CN (d).

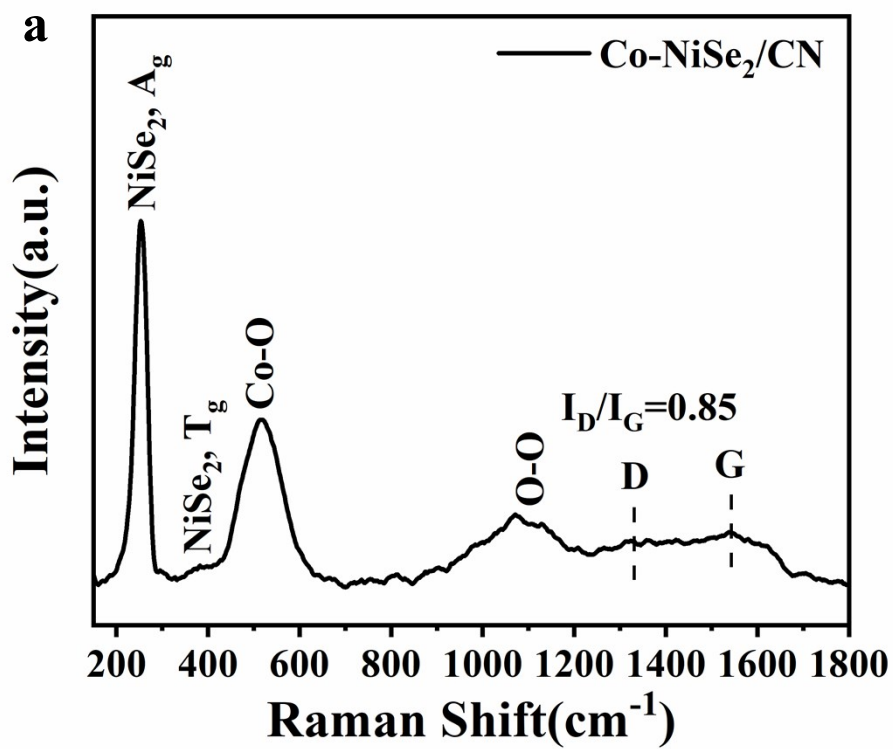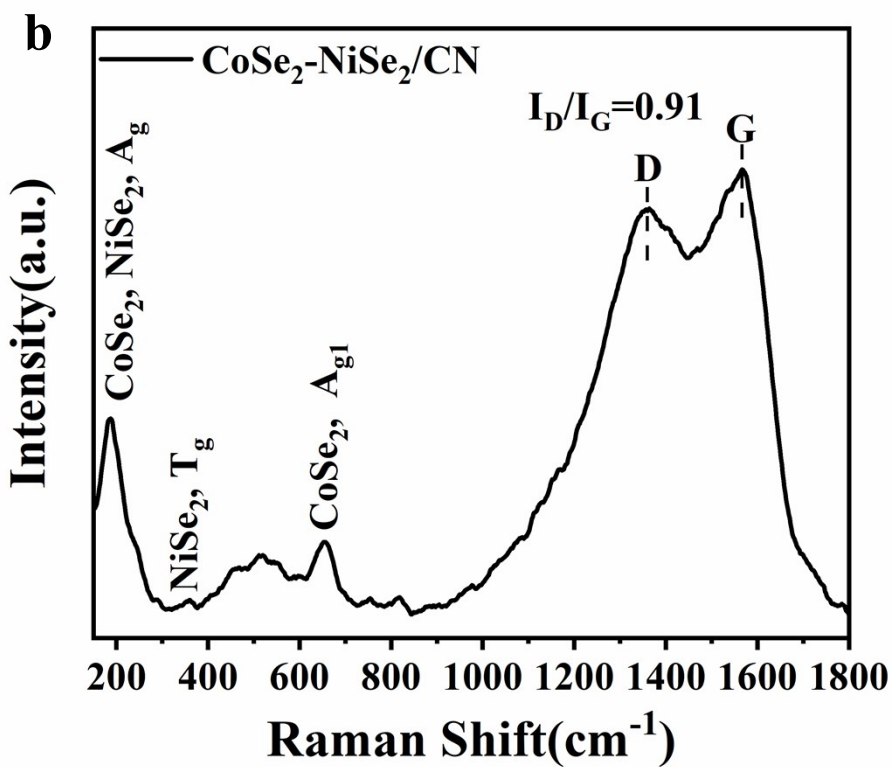

Figure S7 The Raman spectra of Co-NiSe<sub>2</sub>/CN and CoSe<sub>2</sub>-NiSe<sub>2</sub>/CN.



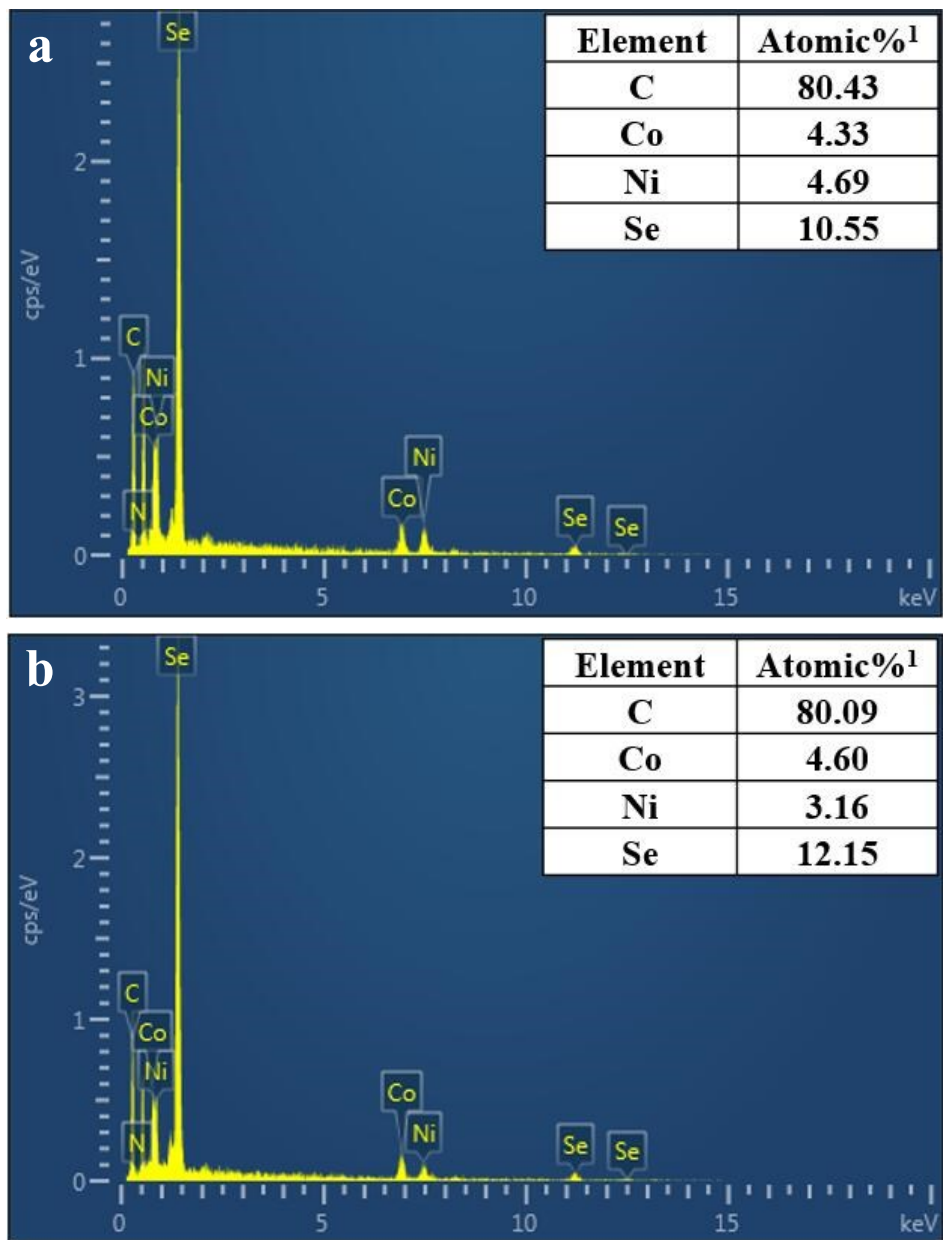

**Figure S8** EDS spectra of Co-NiSe<sub>2</sub>/CN and CoSe<sub>2</sub>-NiSe<sub>2</sub>/CN.

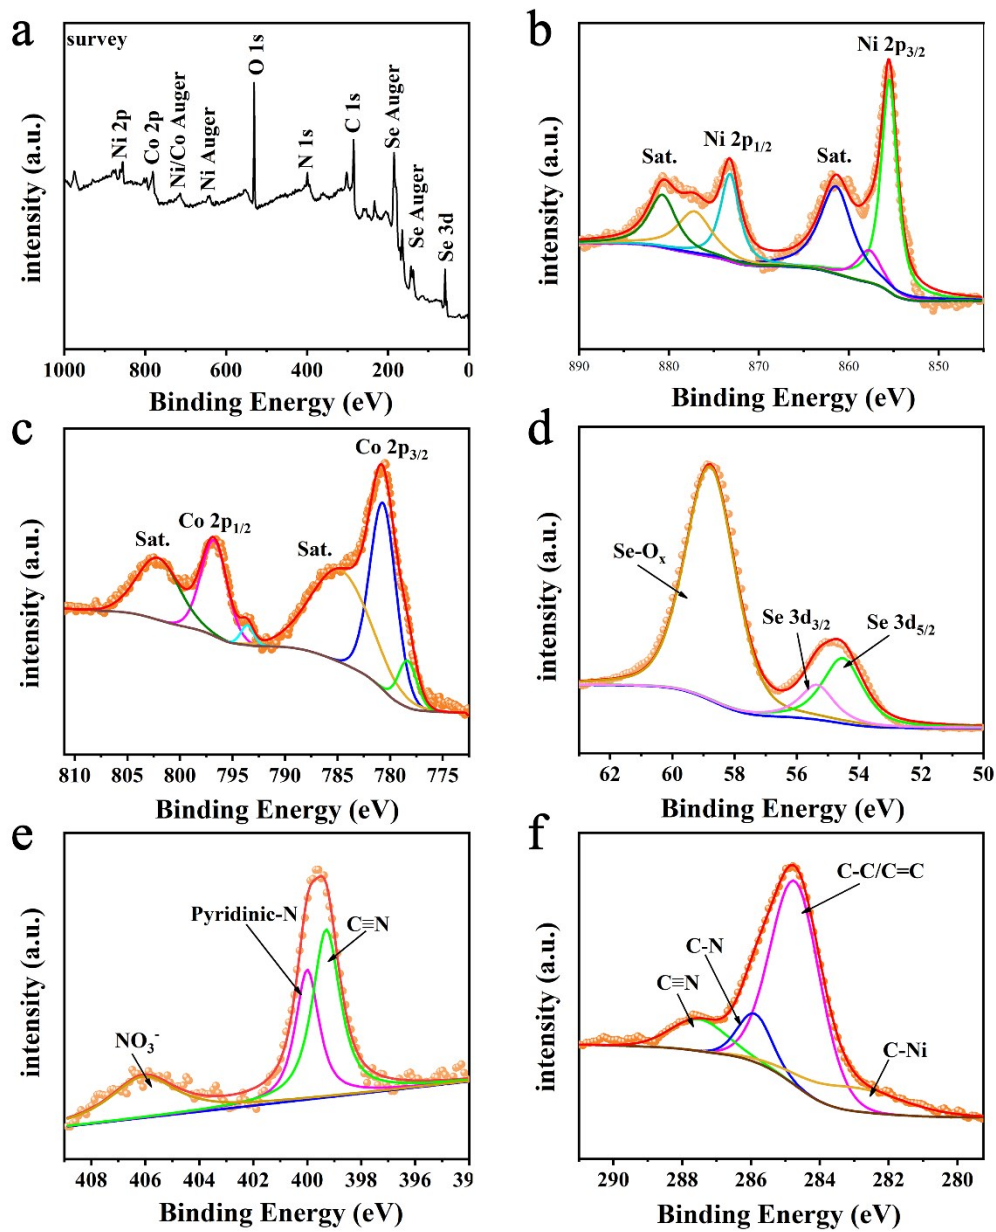

**Figure S9** XPS spectra of Co-NiSe<sub>2</sub>/CN: (a) Full scan spectrum; (b) Ni 2p; (c) Co 2p; (d) Se 3d; (e) N 1s and (f) C 1s.

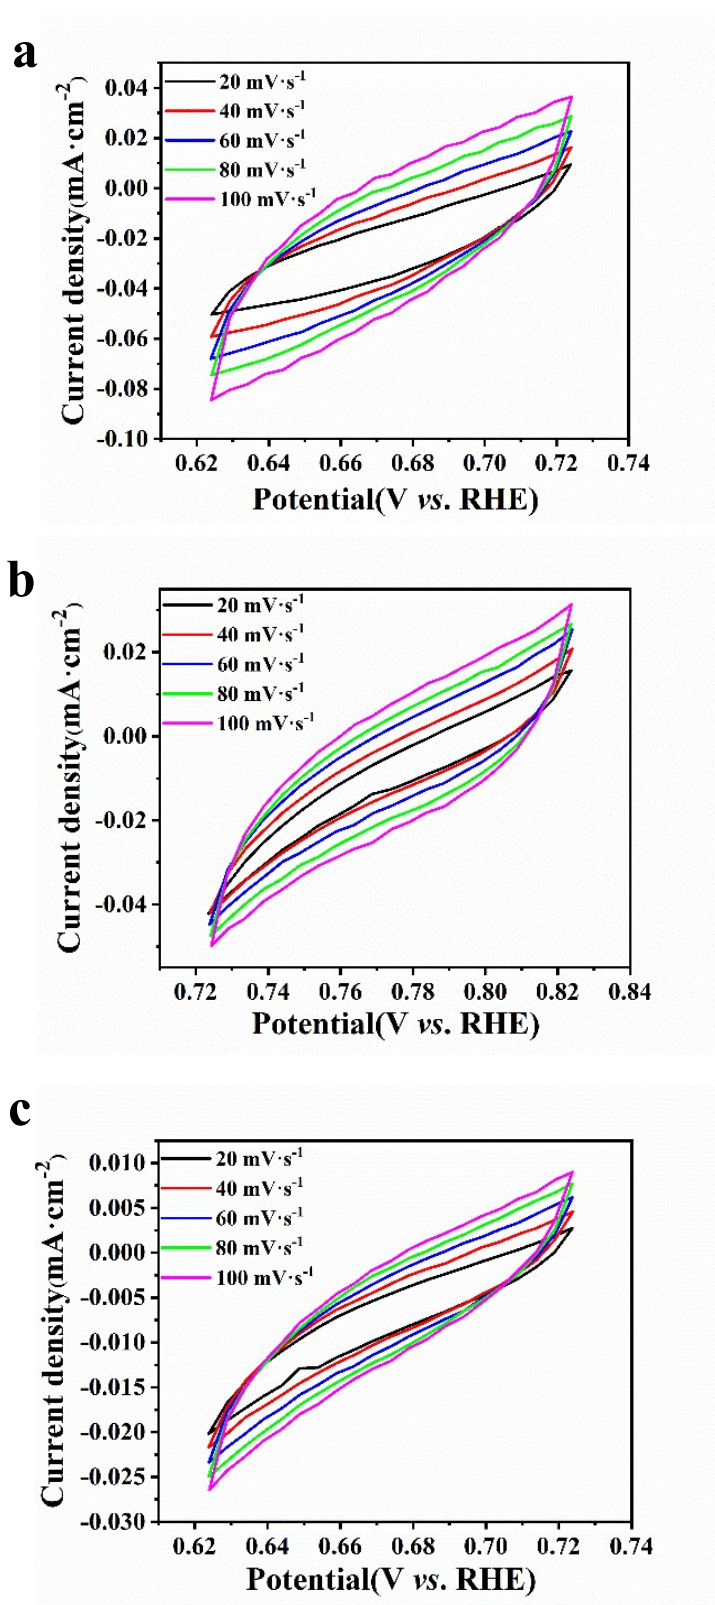

**Figure S10** (a-c) CV curves of Co-NiSe<sub>2</sub>/CN, CoSe<sub>2</sub> and NiSe<sub>2</sub> in 0.5 M H<sub>2</sub>SO<sub>4</sub>

respectively at different scan rates.

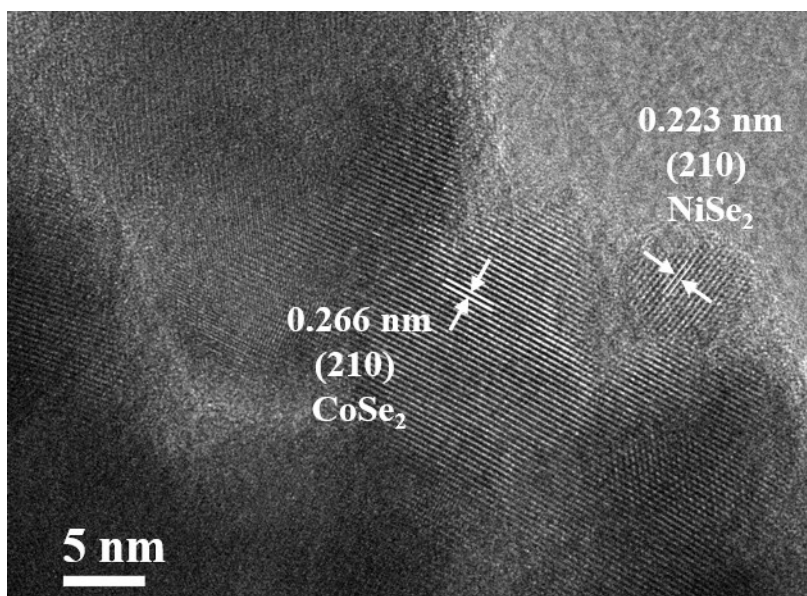

**Figure S11** HRTEM image of CoSe<sub>2</sub>-NiSe<sub>2</sub>/CN after the electrochemical stability test.

## References

1. J.-C. Dong, X.-G. Zhang, V. Briega-Martos, X. Jin, J. Yang, S. Chen, Z.-L. Yang, D.-Y. Wu, J. M. Feliu, C. T. Williams, Z.-Q. Tian and J.-F. Li, In situ Raman spectroscopic evidence for oxygen reduction reaction intermediates at platinum single-crystal surfaces, *Nat. Energy*, 2018, **4**(1), 60-67.
2. J. Yang, H. Liu, W. N. Martens and R. L. Frost, Synthesis and Characterization of Cobalt Hydroxide, Cobalt Oxyhydroxide, and Cobalt Oxide Nanodiscs, *J. Phys. Chem. C*, 2010, **114**(1), 111-119.
